# Supplementary material
Source: publisher site journal article supplement (https://www.dovepress.com/article/313512)
Supplement: Supplementary file 1 [file get_supplementary_file.php]

**Supplementary Figure 1** Scatter plot displaying the relationship between PGI scores and EQ-5D-5L scores.


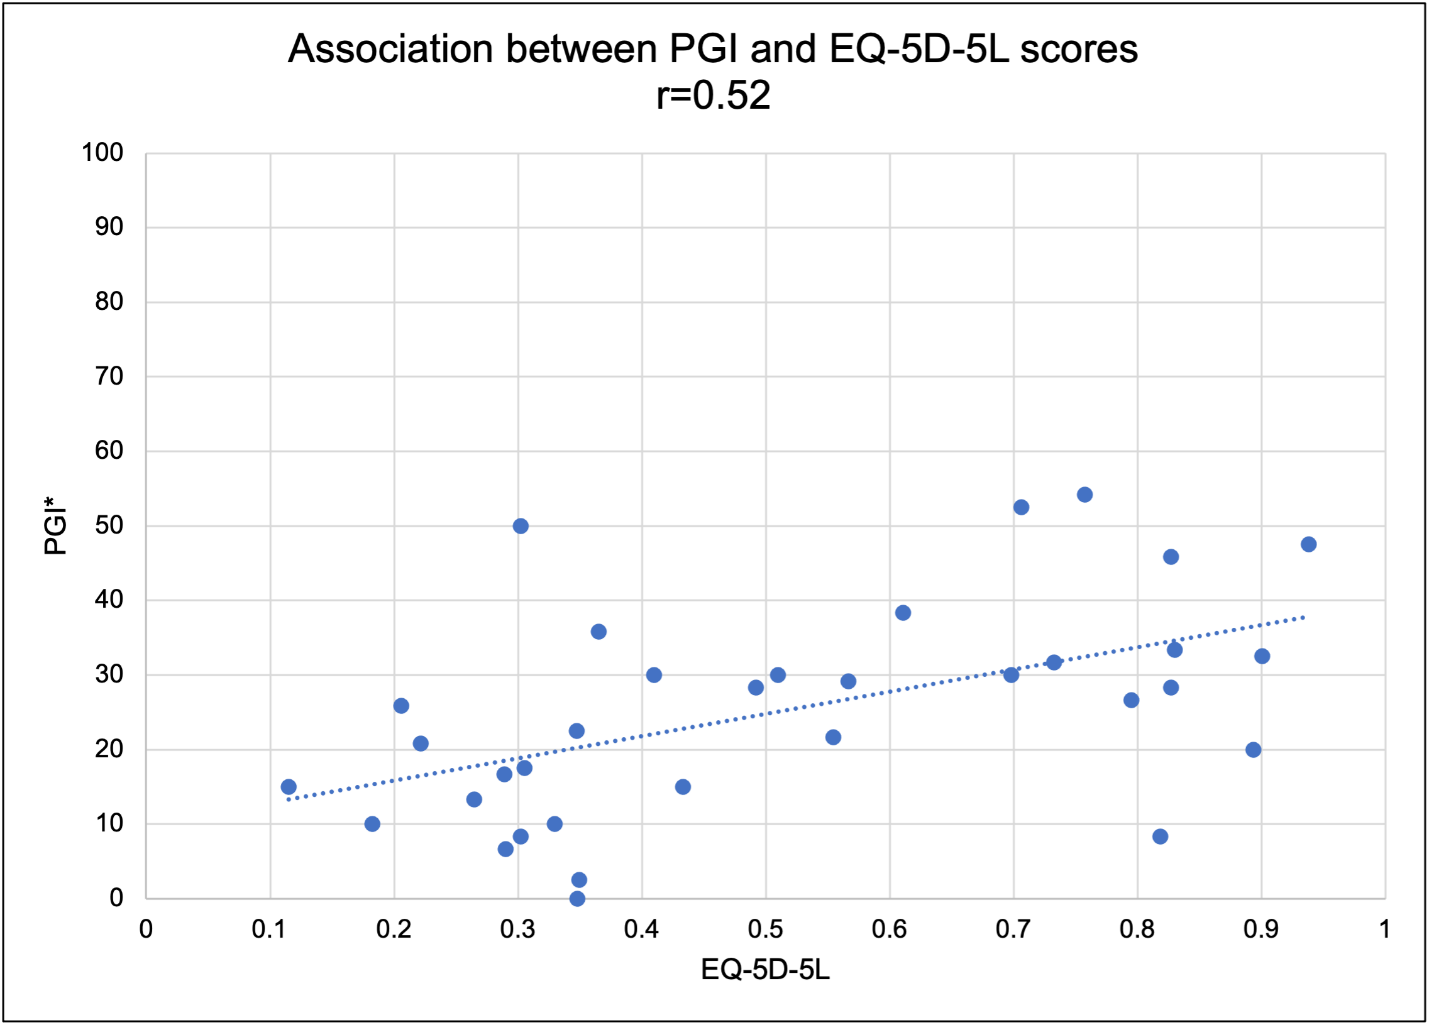


**Notes:** *Missing data (N=17)

**Abbreviations:** PGI, Patient Generated Index; EQ-5D-5L, EuroQol 5 Dimension 5 Level
